# Supplementary material
Source: publisher figshare collection journal article supplement (https://springernature.figshare.com/ndownloader/files/22787468)
Supplement: Supplementary file 1 [file 22787468]

## SUPPLEMENTARY MATERIALS

**Table S1 (Excel File).** Single nuclear RNA-Sequencing (snRNA-seq) of cell type-specific changes to gene expression ( $p$ -value adj.  $< 0.001$  and  $\log_2$  fold change  $> 0.1$  or  $< -0.1$ ) in striatal cell types in wild type control vs. wild type IL-6 KO mice.

**Table S2 (Excel File).** Single nuclear RNA-Sequencing (snRNA-seq) of cell type-specific changes to gene expression ( $p$ -value adj.  $< 0.001$  and  $\log_2$  fold change  $> 0.1$  or  $< -0.1$ ) in striatal cell types in R6/2 HD model vs. R6/2 HD model IL-6 KO mice.

**Figure S1.** IL-6 deficiency exacerbates additional R6/2 behavioral phenotypes.

**Figure S2.** Lack of correlation between mouse body weight and mouse performance on the rotarod test at 6 weeks of age.

**Figure S3.** Lack of correlation between the genetic similarity of individual mice to the congenic C57BL/6 background and behavioral testing performance.

**Figure S4.** snRNA-seq from WT\_KO and R6/2\_KO mice reveals cell-type specific gene expression changes in astroglia and oligodendrocytes that are induced by IL-6 deficiency.

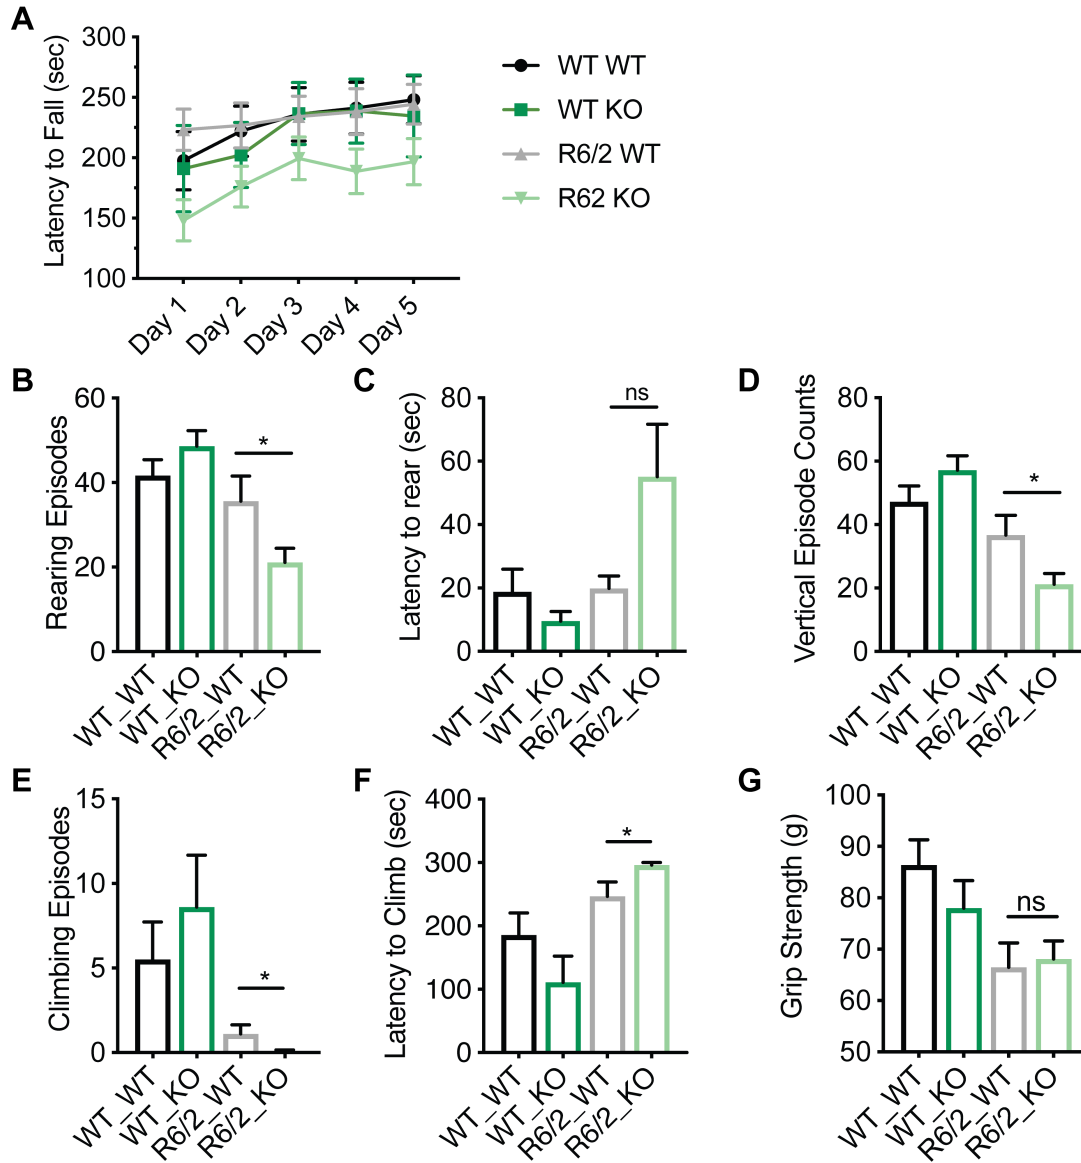

**Figure S1. IL-6 deficiency exacerbates additional R6/2 behavioral phenotypes.** **A.** Rotarod performance over a 5-day testing paradigm at 5 weeks of age. Number of animals per group; WT\_WT ( $n=10$ ), WT\_KO ( $n=5$ ), R6/2\_WT ( $n=10$ ), R6/2\_KO ( $n=13$ ). Two-way repeated measured ANOVA  $p = ns$ , Tukey's multiple comparison  $p = 0.025$  (\*) only for R6/2\_WT vs. R6/2\_KO on day 1 of testing, indicating a difference in the ability of the IL6\_KO mice to learn the motor task (further significances are seen upon further testing, Figure 2). **B-F** Rearing and

climbing testing at 8 weeks of age reveals a deficit in rearing episodes, latency to rear, climbing episodes, latency to climb and total vertical activity in the R6/2\_KO as compared to R6/2\_WT mice.  $p < 0.05$  (\*), two-tailed student's  $t$ -test. **G.** While both the R6/2\_WT and R6/2\_KO have decreased grip strength as compared to controls, there is no significant difference. All data are represented as mean  $\pm$  standard error of the mean.

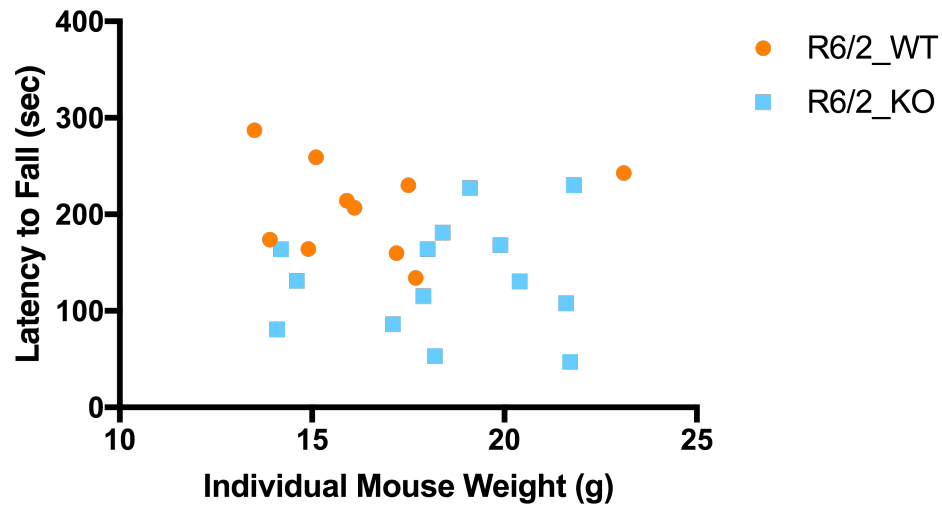

**Figure S2. Lack of correlation between mouse body weight and mouse performance on the rotarod test at 6 weeks of age.** Individual mouse data for the R6/2\_WT and R6/2\_KO mice at 6 weeks of age, plotting weight against latency to fall on the rotarod test. Pearson correlation coefficient for R6/2\_KO  $r = 0.129$ , two-tailed  $p = 0.660$ .

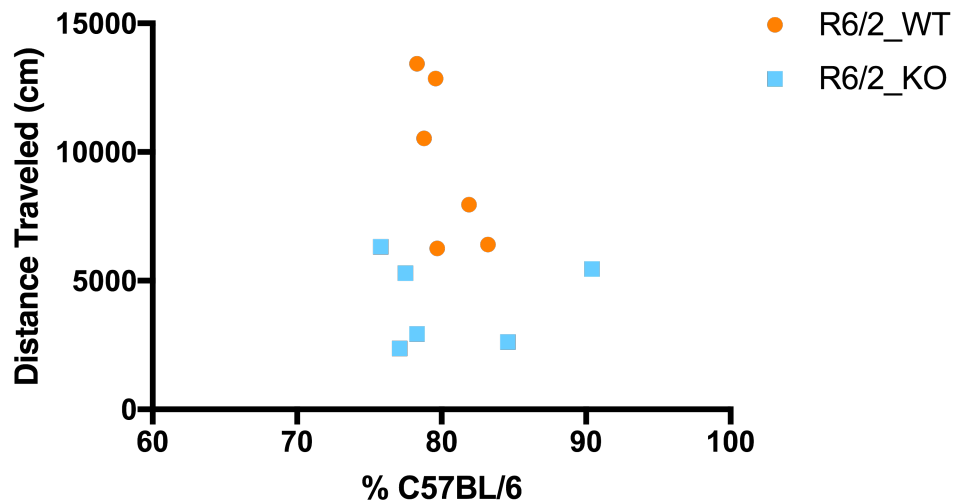

**Figure S3. Lack of correlation between the genetic similarity of individual mice to the congenic C57BL/6 background and behavioral testing performance.** Individual mouse data for the R6/2\_WT and R6/2\_KO mice, plotting percentage (%) similarity to the congenic C57BL/6 strain background (as reported by SNP genotyping) against horizontal distance traveled in the open field assay at 7 weeks of age (for all mice in Figure 2C for which SNP genotyping data was available). Pearson correlation coefficient for R6/2\_KO  $r = 0.036$ , two-tailed  $p = 0.946$ .

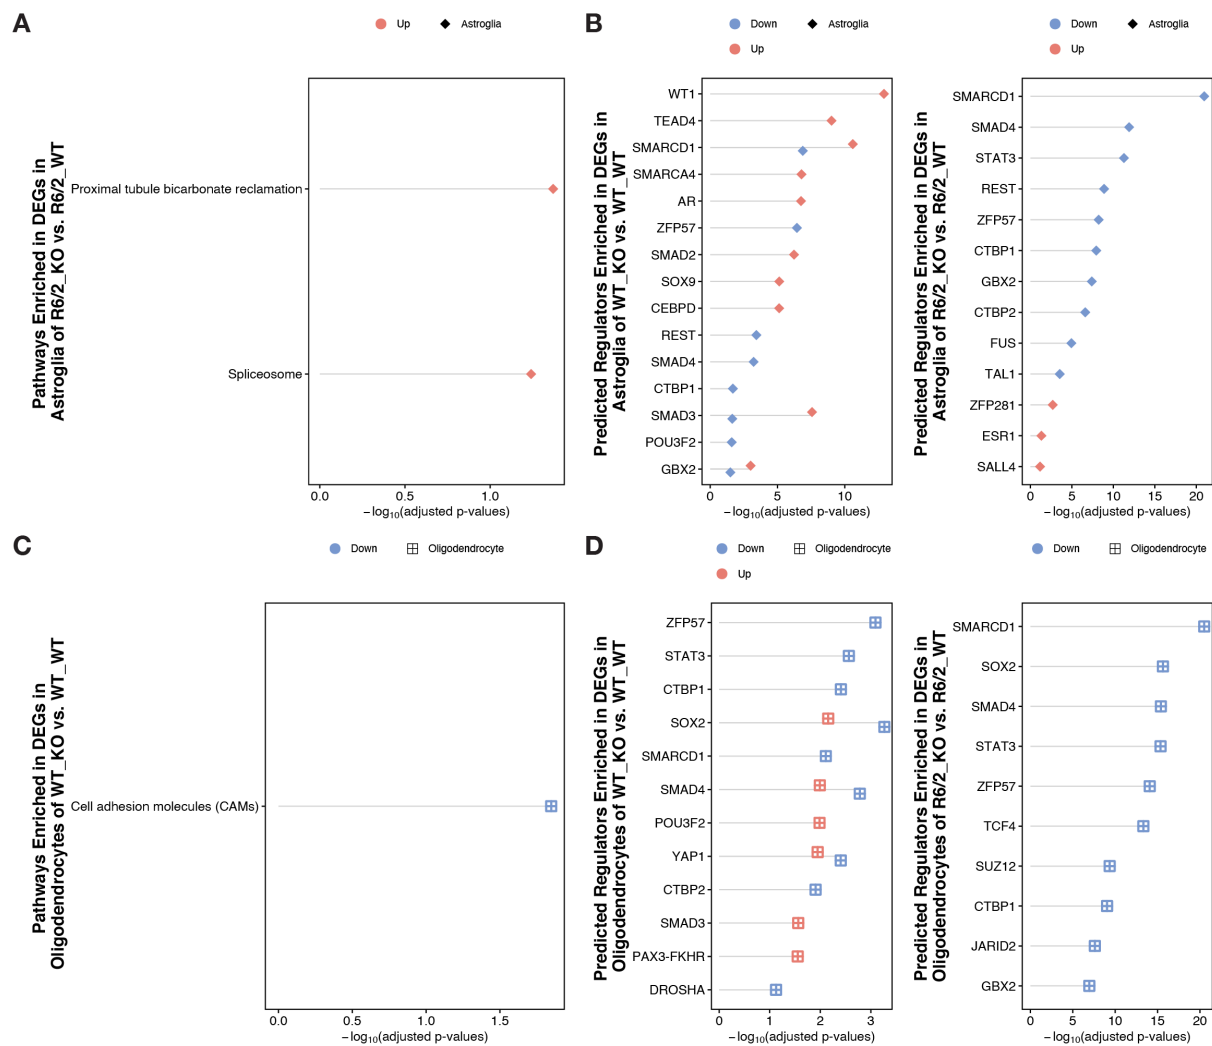

**Figure S4. snRNA-seq from WT\_KO and R6/2\_KO mice reveals cell-type specific gene expression changes in astroglia and oligodendrocytes that are induced by IL-6 deficiency.**

**A.** Enriched KEGG pathways of genes upregulated in astroglia upon IL-6 KO in R6/2 mice, represented with Fisher's exact test  $-\log_{10}$ -adjusted  $p$ -value. There were no significantly enriched pathways among the astroglial downregulated genes, or in the upregulated and downregulated genes in the WT\_KO vs. WT\_WT comparison. **B.** Predicted transcriptional

regulators, by ChEA analysis, of genes that were downregulated and upregulated in striatal astroglia upon IL-6 KO in control mice (left panel) and R6/2 HD model mice (right panel), represented with Fisher's exact test  $-\log_{10}$ -adjusted  $p$ -value. **C.** Enriched KEGG pathways of genes downregulated in oligodendrocytes upon IL-6 KO in control mice, represented with Fisher's exact test  $-\log_{10}$ -adjusted  $p$ -value. There were no significantly enriched pathways among the oligodendrocyte upregulated genes, or in the upregulated and downregulated genes in the R6/2\_KO vs. R6/2\_WT comparison. **D.** Predicted transcriptional regulators, by ChEA analysis, of genes that were downregulated and upregulated in striatal oligodendrocytes upon IL-6 KO in control mice (left panel) and R6/2 HD model mice (right panel), represented with Fisher's exact test  $-\log_{10}$ -adjusted  $p$ -value.
